# Supplementary material
Source: PubMed Central journal article supplement (PMC2963678)
Supplement: NIHMS219628-supplement-01.pdf [file NIHMS219628-supplement-01.pdf]

**Table S1.** Number of participants, deaths, follow-up duration, and death rates per 1,000 person-years for each eGFR and urinary ACR category, stratified by CHD status (January 2010 Data Freeze)

| eGFR Categories   | No baseline history of Coronary Heart Disease* |              |               |              | Baseline history of Coronary Heart Disease |              |              |              |
|-------------------|------------------------------------------------|--------------|---------------|--------------|--------------------------------------------|--------------|--------------|--------------|
|                   | ACR categories                                 |              |               |              | ACR categories                             |              |              |              |
|                   | <10                                            | 10 to <30    | 30 to 300     | >300         | <10                                        | 10 to <30    | 30 to 300    | >300         |
| 90 to <120        |                                                |              |               |              |                                            |              |              |              |
| No.               | 3,765                                          | 2,330        | 683           | 81           | 643                                        | 572          | 181          | 34           |
| Deaths            | 48                                             | 52           | 30            | 7            | 22                                         | 28           | 9            | 3            |
| FU (years)        | 3.54                                           | 3.54         | 3.56          | 3.16         | 3.63                                       | 3.68         | 3.513        | 3.31         |
| <b>Death rate</b> | <b>3.60</b>                                    | <b>6.30</b>  | <b>12.35</b>  | <b>27.34</b> | <b>9.43</b>                                | <b>13.29</b> | <b>14.15</b> | <b>26.67</b> |
| 60 to <90         |                                                |              |               |              |                                            |              |              |              |
| No.               | 3,212                                          | 1,893        | 674           | 101          | 823                                        | 693          | 307          | 71           |
| Deaths            | 70                                             | 84           | 42            | 11           | 35                                         | 40           | 35           | 13           |
| FU (years)        | 3.63                                           | 3.61         | 3.50          | 3.36         | 3.63                                       | 3.65         | 3.50         | 3.28         |
| <b>Death rate</b> | <b>6.00</b>                                    | <b>12.29</b> | <b>17.80</b>  | <b>32.43</b> | <b>11.72</b>                               | <b>15.80</b> | <b>32.55</b> | <b>55.84</b> |
| 45 to <60         |                                                |              |               |              |                                            |              |              |              |
| No.               | 336                                            | 252          | 180           | 50           | 128                                        | 143          | 106          | 34           |
| Deaths            | 10                                             | 15           | 19            | 9            | 10                                         | 18           | 23           | 8            |
| FU (years)        | 3.69                                           | 3.49         | 3.52          | 3.14         | 3.68                                       | 3.27         | 3.05         | 3.63         |
| <b>Death rate</b> | <b>8.07</b>                                    | <b>17.07</b> | <b>30.01</b>  | <b>57.32</b> | <b>11.72</b>                               | <b>38.49</b> | <b>71.11</b> | <b>64.79</b> |
| 30 to <45         |                                                |              |               |              |                                            |              |              |              |
| No.               | 79                                             | 87           | 75            | 27           | 33                                         | 41           | 53           | 23           |
| Deaths            | 4                                              | 10           | 9             | 4            | 3                                          | 5            | 14           | 6            |
| FU (years)        | 3.38                                           | 3.80         | 3.21          | 3.52         | 3.60                                       | 3.39         | 3.25         | 3.30         |
| <b>Death rate</b> | <b>14.96</b>                                   | <b>30.26</b> | <b>37.40</b>  | <b>42.04</b> | <b>25.25</b>                               | <b>36.00</b> | <b>71.11</b> | <b>79.15</b> |
| 15 to <30         |                                                |              |               |              |                                            |              |              |              |
| No.               | 8                                              | 8            | 15            | 39           | 9                                          | 13           | 16           | 27           |
| Deaths            | 1                                              | 2            | 4             | 6            | 0                                          | 4            | 8            | 8            |
| FU (years)        | 3.25                                           | 2.73         | 2.66          | 3.52         | 3.80                                       | 3.32         | 3.15         | 3.30         |
| <b>Death rate</b> | <b>38.48</b>                                   | <b>91.57</b> | <b>100.42</b> | <b>45.56</b> | <b>0.00</b>                                | <b>92.79</b> | <b>158.8</b> | <b>89.66</b> |

*Supplementary Table S1; Warnock et al, AJKD, Kidney Function, Albuminuria, and All-Cause Mortality in the REGARDS (Reasons for Geographic and Racial Differences in Stroke) Study”*

Coronary heart disease defined as self-reported myocardial infarction or history of coronary artery procedure, or electrocardiographic evidence of a previous myocardial infarction; FU, follow time, expressed as median years. Death rates are expressed per 1,000 person-years.
