# Supplementary material
Source: PubMed Central journal article supplement (PMC2963678)
Supplement: NIHMS219628-supplement-02.pdf [file NIHMS219628-supplement-02.pdf]

**Table S2.** Analysis of Maximum Likelihood Estimates: 5 x 4 Table; eGFR and ACR Categorical Analysis\* (January 2010 Data Freeze)

| Parameter                             | $\beta$ Coefficient | Standard Error | Chi Square | Probability > Chi Square | Hazard Ratio | Lower 95% CI Limit | Upper 95% CI Limit | Trend P Values                                                   |
|---------------------------------------|---------------------|----------------|------------|--------------------------|--------------|--------------------|--------------------|------------------------------------------------------------------|
| GFR1_ACR1                             | 0                   |                |            |                          | 1            |                    |                    |                                                                  |
| GFR2_ACR1                             | 0.0486              | 0.1627         | 0.089      | 7.651E-01                | 1.050        | 0.763              | 1.444              | 0.405 (GFR1_ACR1...GFR5_ACR1)                                    |
| GFR3_ACR1                             | 0.1162              | 0.2677         | 0.188      | 6.643E-01                | 1.123        | 0.665              | 1.898              |                                                                  |
| GFR4_ACR1                             | 0.2482              | 0.4344         | 0.326      | 5.678E-01                | 1.282        | 0.547              | 3.003              |                                                                  |
| GFR5_ACR1                             | 0.1739              | 1.0121         | 0.030      | 8.636E-01                | 1.190        | 0.164              | 8.650              |                                                                  |
| ACR2_GFR1                             | 0.3611              | 0.1683         | 4.601      | 3.200E-02                | 1.435        | 1.032              | 1.996              | <0.001 (GFR1_ACR1...GFR1_ACR4)                                   |
| ACR3_GFR1                             | 0.5874              | 0.2055         | 8.172      | 4.300E-03                | 1.799        | 1.203              | 2.692              |                                                                  |
| ACR4_GFR1                             | 1.1782              | 0.3444         | 11.707     | 6.000E-04                | 3.249        | 1.654              | 6.380              |                                                                  |
| Joint Probabilities Across Categories |                     |                |            |                          |              |                    |                    |                                                                  |
| GFR <sub>2</sub> _ACR <sub>2</sub>    | 0.4110              | 0.1620         | 2.537      | 5.59E-03                 | 1.508        | 1.029              | 1.986              | <0.001 (GFR2_ACR1...GFR2_ACR4)<br>0.013 (GFR1_ACR2...GFR5_ACR2)  |
| GFR <sub>2</sub> _ACR <sub>3</sub>    | 0.6410              | 0.1800         | 3.555      | 1.89E-04                 | 1.899        | 1.228              | 2.571              |                                                                  |
| GFR <sub>2</sub> _ACR <sub>4</sub>    | 1.1390              | 0.2550         | 4.474      | 3.83E-06                 | 3.124        | 1.565              | 4.682              | <0.001 (GFR3_ACR1...GFR3_ACR4)<br><0.001 (GFR1_ACR3...GFR5_ACR3) |
| GFR <sub>3</sub> _ACR <sub>2</sub>    | 0.7140              | 0.2260         | 3.154      | 8.04E-04                 | 2.041        | 1.136              | 2.946              |                                                                  |
| GFR <sub>3</sub> _ACR <sub>3</sub>    | 0.9540              | 0.2180         | 4.383      | 5.84E-06                 | 2.596        | 1.489              | 3.703              |                                                                  |
| GFR <sub>3</sub> _ACR <sub>4</sub>    | 1.5130              | 0.2830         | 5.351      | 4.38E-08                 | 4.540        | 2.024              | 7.055              | 0.079 (GFR4_ACR1...GFR4_ACR4)<br>0.460 (GFR1_ACR4...GFR5_ACR4)   |
| GFR <sub>4</sub> _ACR <sub>2</sub>    | 0.8600              | 0.2980         | 2.881      | 1.98E-03                 | 2.362        | 0.981              | 3.743              |                                                                  |
| GFR <sub>4</sub> _ACR <sub>3</sub>    | 1.2560              | 0.2560         | 4.902      | 4.73E-07                 | 3.510        | 1.748              | 5.273              |                                                                  |
| GFR <sub>4</sub> _ACR <sub>4</sub>    | 1.5150              | 0.3470         | 4.359      | 6.53E-06                 | 4.548        | 1.451              | 7.645              |                                                                  |
| GFR <sub>5</sub> _ACR <sub>2</sub>    | 1.6800              | 0.4380         | 3.833      | 6.33E-05                 | 5.364        | 0.757              | 9.971              | 0.224<br>(GFR 5_ACR1... GFR5_ACR4)                               |
| GFR <sub>5</sub> _ACR <sub>3</sub>    | 2.4000              | 0.3250         | 7.383      | 7.74E-14                 | 11.021       | 4.000              | 18.041             |                                                                  |
| GFR <sub>5</sub> _ACR <sub>4</sub>    | 1.4380              | 0.3150         | 4.567      | 2.47E-06                 | 4.212        | 1.613              | 6.812              |                                                                  |
| Cross Product Terms                   |                     |                |            |                          |              |                    |                    |                                                                  |
| gfr <sub>2</sub> *acr <sub>2</sub>    | 0.0010              | 0.2139         | 0.000      | 0.996                    | 1.001        | 0.658              | 1.522              |                                                                  |
| gfr <sub>2</sub> *acr <sub>3</sub>    | 0.0054              | 0.2533         | 0.001      | 0.983                    | 1.005        | 0.612              | 1.652              |                                                                  |
| gfr <sub>2</sub> *acr <sub>4</sub>    | -0.0878             | 0.4139         | 0.045      | 0.832                    | 0.916        | 0.407              | 2.061              |                                                                  |
| gfr <sub>3</sub> *acr <sub>2</sub>    | 0.2363              | 0.3333         | 0.503      | C67                      | 1.267        | 0.659              | 2.434              |                                                                  |
| gfr <sub>3</sub> *acr <sub>3</sub>    | 0.2502              | 0.3459         | 0.523      | 0.470                    | 1.284        | 0.652              | 2.530              |                                                                  |
| gfr <sub>3</sub> *acr <sub>4</sub>    | 0.2184              | 0.4783         | 0.209      | 0.648                    | 1.244        | 0.487              | 3.176              |                                                                  |
| gfr <sub>4</sub> *acr <sub>2</sub>    | 0.2502              | 0.5116         | 0.239      | 0.625                    | 1.284        | 0.471              | 3.501              |                                                                  |
| gfr <sub>4</sub> *acr <sub>3</sub>    | 0.4201              | 0.5026         | 0.699      | 0.403                    | 1.522        | 0.568              | 4.077              |                                                                  |
| gfr <sub>4</sub> *acr <sub>4</sub>    | 0.0882              | 0.6200         | 0.020      | 0.887                    | 1.092        | 0.324              | 3.682              |                                                                  |
| gfr <sub>5</sub> *acr <sub>2</sub>    | 1.14474             | 1.09585        | 1.091      | 0.2962                   | 3.142        | 0.367              | 26.91              |                                                                  |
| gfr <sub>5</sub> *acr <sub>3</sub>    | 1.63849             | 1.06396        | 2.3716     | 0.1236                   | 5.147        | 0.640              | 41.42              |                                                                  |
| gfr <sub>5</sub> *acr <sub>4</sub>    | 0.08589             | 1.0952         | 0.0062     | 0.9375                   | 1.090        | 0.127              | 9.32               |                                                                  |

Supplementary Table S2; Warnock et al, *AJKD, Kidney Function, Albuminuria, and All-Cause Mortality in the REGARDS (Reasons for Geographic and Racial Differences in Stroke) Study*

|                                                  | $\beta$<br>Coefficient | Standard<br>Error | Chi<br>Square | Probability ><br>Chi Square | Hazard<br>Ratio | Lower 95%<br>CI Limit | Upper 95%<br>CI Limit |  |
|--------------------------------------------------|------------------------|-------------------|---------------|-----------------------------|-----------------|-----------------------|-----------------------|--|
| Covariates                                       |                        |                   |               |                             |                 |                       |                       |  |
| Age                                              | 0.06588                | 0.0050            | 173.843       | <.0001                      | 1.068           | 1.058                 | 1.079                 |  |
| Male                                             | 0.8742                 | 0.0844            | 107.212       | <.0001                      | 2.397           | 2.031                 | 2.828                 |  |
| White Race                                       | 0.06218                | 0.0872            | 0.508         | 4.760E-01                   | 1.064           | 0.897                 | 1.263                 |  |
| >HSE                                             | -0.35559               | 0.0984            | 13.056        | 3.000E-04                   | 0.701           | 0.578                 | 0.850                 |  |
| Curr Smok                                        | 0.86806                | 0.1015            | 73.175        | <.0001                      | 2.382           | 1.953                 | 2.907                 |  |
| BMI                                              | 0.00171                | 0.0072            | 0.057         | 8.117E-01                   | 1.002           | 0.988                 | 1.016                 |  |
| Hypertension                                     | 0.58067                | 0.1902            | 9.317         | 2.300E-03                   | 1.787           | 1.231                 | 2.595                 |  |
| Hypertension *<br>log(follow-up<br>time in days) | -0.0004                | 0.0002            | 5.591         | 0.018                       | 1.000           | 0.999                 | 1.000                 |  |
| Diabetes                                         | 0.28491                | 0.0897            | 10.082        | 1.500E-03                   | 1.330           | 1.115                 | 1.585                 |  |
| Dyslipidemia                                     | -0.04926               | 0.0806            | 0.374         | 5.411E-01                   | 0.952           | 0.813                 | 1.115                 |  |
| Hemoglobin                                       | -0.18212               | 0.0291            | 39.057        | <.0001                      | 0.833           | 0.787                 | 0.882                 |  |

17,393 REGARDS participants with 710 deaths as of January 2010. The hazard ratios were obtained with Cox's proportional hazards regression, and were adjusted for age, gender, race, >HSE (greater than high school educational status), Curr Smok (current smoking status), BMI (body mass index), hypertension, diabetes, dyslipidemia and hemoglobin.

GFR1 refers to eGFR 90 to <120 mL/min/1.73 m<sup>2</sup> (reference 1.00), and GFR2...GFR5 refer to the other eGFR categories. The ACR categories were defined as: ACR1 <10 mg/g (reference 1.00); ACR2 10 to <30 mg/g; ACR3 30 to 300 mg/g; and ACR4 >300 mg/g

The cross-product terms (gfr<sub>i</sub>\*acr<sub>j</sub>) refer to the interaction terms in the linear regression model.

The coefficient of the Joint Probability terms (GFR<sub>i</sub>\_ACR<sub>j</sub>) refers to the sum of the coefficients of GFR<sub>i</sub>+ACR<sub>j</sub>+gfr<sub>i</sub>\*acr<sub>j</sub>.

†There were significant additive interactions for the GFR5\_ACR3 probability of joint exposure: relative excess risk of interaction, 8.910, 95% CI (1.837 to 15.983, P = 0.007); proportion of excess risk attributable to the joint exposure, 0.818, 95% CI (0.181 to 1.454, P = 0.006). The biologic significance of this single interaction is unknown, especially in view of the relative small number of participants in this category.
