# Supplementary material
Source: PubMed Central journal article supplement (PMC2963678)
Supplement: NIHMS219628-supplement-03.pdf [file NIHMS219628-supplement-03.pdf]

**Table S3.** Analysis of Maximum Likelihood Estimates: 2x4 Table; CHD and ACR Categorical Analysis\* (January 2010 Data Freeze)

| Parameter                             | b Coefficient | Standard Error | Chi Square | Probability > Chi Square | Hazard Ratio | Lower 95% CI Limit | Upper 95% CI Limit | Trend P Values (row, column) |
|---------------------------------------|---------------|----------------|------------|--------------------------|--------------|--------------------|--------------------|------------------------------|
| CHD1 (No)                             | 0             |                |            |                          | 1.00         |                    |                    |                              |
| CHD2_ACR1                             | 0.4321        | 0.1520         | 8.081      | 0.005                    | 1.540        | 1.144              | 2.075              |                              |
| ACR2_CHD1                             | 0.4877        | 0.1179         | 17.128     | <.0001                   | 1.629        | 1.293              | 2.052              | 0.014<br>(CHD1ACR1_CHD1ACR4) |
| ACR3_CHD1                             | 0.7038        | 0.1354         | 27.007     | <.0001                   | 2.021        | 1.550              | 2.636              |                              |
| ACR4_CHD1                             | 1.1146        | 0.1975         | 31.840     | <.0001                   | 3.048        | 2.070              | 4.490              |                              |
| Joint Probabilities Across Categories |               |                |            |                          |              |                    |                    |                              |
| CHD2_ACR2                             | 0.6930        | 0.1390         | 4.980      | 0.03                     | 2.000        | 1.454              | 2.545              | 0.001<br>(CHD2ACR1_CHD2ACR4) |
| CHD2_ACR3                             | 1.0790        | 0.1480         | 7.278      | 0.01                     | 2.942        | 2.087              | 3.797              |                              |
| CHD2_ACR4                             | 1.4100        | 0.2000         | 7.048      | 0.01                     | 4.095        | 2.490              | 5.700              |                              |
| Cross-Product Terms                   |               |                |            |                          |              |                    |                    |                              |
| chd2*acr2                             | -0.22682      | 0.19787        | 0.000      | 0.25                     | 0.797        | 0.541              | 1.175              |                              |
| chd2*acr3                             | -0.05676      | 0.20972        | 0.073      | 0.79                     | 0.945        | 0.626              | 1.425              |                              |
| chd2*acr4                             | -0.13696      | 0.27894        | 0.241      | 0.62                     | 0.872        | 0.505              | 1.506              |                              |

\*The hazard ratios were obtained with Cox proportional hazards regression, and were adjusted for age, race, gender, educational status, current smoking status, body mass index, hypertension, diabetes, dyslipidemia, hemoglobin, and eGFR. . CHD1 refers to absence of CHD (reference 1.00), and CHD2 refers prevalent CHD. The ACR categories were: 1 (Normal <10 mg/g); 2 (High Normal 10 to >30 mg/g); 3 (High 30 to 300 mg/g) and 4 (Very High >300 mg/g)

The cross-product terms (chd<sub>i</sub>\*acr<sub>j</sub>) refer to the interaction terms in the linear regression model.

The coefficient of the Joint Probability terms (CHD<sub>i</sub>\_ACR<sub>j</sub>) refers to the sum of the coefficients of CHD<sub>i</sub>+ACR<sub>j</sub>+chd<sub>i</sub>\*acr<sub>j</sub>.
