# Supplementary material
Source: PubMed Central journal article supplement (PMC2963678)
Supplement: NIHMS219628-supplement-04.pdf [file NIHMS219628-supplement-04.pdf]

**Table S4.** Analysis of Maximum Likelihood Estimates: 2x4 Table; CHD and eGFR Categorical Analysis\* (January 2010 Data Freeze)

| Parameter                             | b Coefficient | Standard Error | Chi Square | Probability > Chi Square | Hazard Ratio | Lower 95% CI Limit | Upper 95% CI Limit | Trend P Values (row, column) |
|---------------------------------------|---------------|----------------|------------|--------------------------|--------------|--------------------|--------------------|------------------------------|
| CHD1 (No)                             | 0             |                |            |                          | 1            |                    |                    |                              |
| CHD2-GFR1                             | 0.3640        | 0.1561         | 5.436      | 0.020                    | 1.439        | 0.663              | 3.122              |                              |
| GFR2_CDH1                             | 0.0656        | 0.1157         | 0.321      | 0.571                    | 1.068        | 0.548              | 2.080              | 0.001<br>(CHD1GFR1_CHD1GFR4) |
| GFR3_CHD1                             | 0.2371        | 0.1711         | 1.921      | 0.166                    | 1.268        | 0.564              | 2.851              |                              |
| GFR4_CHD1                             | 0.4631        | 0.2217         | 4.364      | 0.037                    | 1.589        | 0.631              | 3.998              |                              |
| GFR5_CHD1                             | 1.0128        | 0.3042         | 11.089     | 0.001                    | 2.753        | 1.517              | 4.998              |                              |
| Joint Probabilities Across Categories |               |                |            |                          |              |                    |                    |                              |
| CHD2_GFR2                             | 0.2690        | 0.1360         | 1.982      | 0.024                    | 1.309        | 0.960              | 1.657              | 0.001 (CHD2GFR1_HD2GFR4)     |
| CHD2_GFR3                             | 0.7660        | 0.1720         | 4.449      | 0.000                    | 2.150        | 1.425              | 2.876              |                              |
| CHD2_GFR4                             | 1.0650        | 0.2200         | 4.845      | 0.000                    | 2.900        | 1.651              | 4.150              |                              |
| †                                     |               |                |            |                          |              |                    |                    |                              |
| CHD2_GFR5                             | 1.4470        | 0.2590         | 5.581      | 0.000                    | 4.250        | 2.091              | 6.409              |                              |
| Cross-Product Terms                   |               |                |            |                          |              |                    |                    |                              |
| chd2*gfr2                             | -0.16048      | 0.19306        | 0.691      | 0.406                    | 0.852        | 0.360              | 2.015              |                              |
| chd2*gfr3                             | 0.16458       | 0.24607        | 0.447      | 0.504                    | 1.179        | 0.446              | 3.117              |                              |
| chd2*gfr4                             | 0.23782       | 0.31172        | 0.582      | 0.446                    | 1.268        | 0.425              | 3.789              |                              |
| chd2*gfr5                             | 0.07002       | 0.39282        | 0.032      | 0.859                    | 1.073        | 0.497              | 2.316              |                              |

\*The hazard ratios were obtained with Cox proportional hazards regression, and were adjusted for age, race, gender, educational status, current smoking status, body mass index, hypertension, diabetes, dyslipidemia, hemoglobin and ACR. CHD1 refers to absence of CHD (reference 1.00), and CHD2 refers to prevalent CHD. The eGFR categories were defined as (mL/min/1.73 m<sup>2</sup>): GFR1 90 to <120 (reference 1.00); GFR2 60 to <90; GFR3 45 to <60; GFR4 30 to <45; and GFR5 15 to <30.

The hazard ratios were obtained with Cox proportional hazards regression, and were adjusted for age, race, gender, educational status, current smoking status, body mass index, hypertension, diabetes, dyslipidemia, hemoglobin, and eGFR.

†There was significant additive interaction for the CHD2\_GFR4 probability of joint exposure: relative excess risk of interaction, 1.173, 95% CI (-0.002 to 2.349, P = 0.025); proportion of excess risk attributable to the joint exposure, 0.34, 95% CI (0.019 to 0.662, P = 0.019), but The biologic significance of this single interaction is unknown, especially in view of the relative small number of participants in this category
